# Supplementary material for: Postnatal mechanical loading drives adaptation of tissues primarily through modulation of the non-collagenous matrix
Source: eLife. 2020 Oct 16;9:e58075. doi: 10.7554/eLife.58075 (PMC7593091; doi:10.7554/eLife.58075)
Supplement: Figure 1—source data 1. [file elife-58075-fig1-data1.xlsx]

## Sheet: Sheet1
Fascicles testing
Group Average	SDFT fascicle					CDET fascicle
	foetus	0 days	0-1 month	3-6 months	1-2 years	foetus	0 days	0-1 month	3-6 months	1-2 years
Hysteresis (%)	38.2033	39.8019	39.7382	40.8968	39.5887	40.9782	41.8614	39.216	43.0317	47.7688
Stress relaxation (%)	12.8114	13.1886	12.8375	13.4871	11.6383	13.509	13.8341	13.3637	14.6804	15.8045
Failure stress (MPa)	23.173	54.5699	54.1153	41.8568	38.4617	27.1199	49.3634	36.4905	32.1333	39.2061
Failure strain (%)	10.6182	12.8894	12.9847	12.7493	10.7744	10.7882	11.9854	12.2248	10.8118	13.838
Elastic modulus (MPa)	331.921	712.439	686.244	597.138	526.028	475.209	716.297	573.11	540.015	580.738
Yield stress (MPa)	5.51037	11.1086	11.9038	8.86865	6.58474	6.35305	11.6832	9.36931	8.18053	8.8533
Yield strain (%)	2.36248	2.31535	2.37389	2.34962	2.31361	2.23739	2.34122	2.36588	2.30867	2.38167
Standard deviation	SDFT fascicle					CDET fascicle
	foetus	0 days	0-1 month	3-6 months	1-2 years	foetus	0 days	0-1 month	3-6 months	1-2 years
Hysteresis (%)	2.67824	1.81028	3.58106	2.53781	2.80942	3.45715	3.31924	4.53352	5.14635	3.89276
Stress relaxation (%)	0.787714	1.32312	0.28544	1.88436	1.60498	1.62704	2.43442	1.62777	0.910321	1.68127
Failure stress (MPa)	15.87	23.0692	5.95563	15.0735	15.1385	7.47222	17.2598	8.92682	4.97275	4.32914
Failure strain (%)	1.53135	0.884677	1.49054	1.1818	2.61715	1.59338	1.20061	0.808796	1.49045	1.21679
Elastic modulus (MPa)	157.377	239.205	112.591	128.641	147.635	133.442	219.273	65.5036	77.7483	61.8518
Yield stress (MPa)	2.47738	4.08983	3.02327	2.59413	1.53514	2.01532	4.25385	1.17733	1.4293	1.15017
Yield strain (%)	0.00515337	0.0554175	0.0368798	0.065088	0.0589861	0.0789348	0.0722874	0.0120668	0.0113399	0.0355291
IFM testing
Group Average	SDFT IFM					CDET IFM
	foetus	0 days	0-1 month	3-6 months	1-2 years	foetus	0 days	0-1 month	3-6 months	1-2 years
Hysteresis (%)	48.2097	48.1473	47.083	45.2271	41.0099	44.968	47.1807	48.3842	47.0203	49.8854
Stress relaxation (%)	20.2391	18.2843	24.1717	17.0296	14.3294	14.2001	17.809	18.2605	16.1495	20.5195
Force at failure (N)	0.699265	0.977217	0.96603	1.68834	1.62231	0.611039	1.05636	0.981112	1.03248	1.46784
Extension at failure (mm)	2.27047	2.83957	2.68075	3.16322	2.29363	1.8603	2.57085	2.78419	2.77458	3.06103
Maximum stiffness (N/mm)	0.566833	0.731039	0.788339	1.04303	1.21426	0.527784	0.80056	0.784104	0.796056	1.03159
Yield force (N)	0.150169	0.233437	0.234019	0.286487	0.535548	0.168297	0.267222	0.231131	0.249034	0.26977
Yield extension (mm)	0.545839	0.506547	0.628532	0.514843	0.712598	0.520954	0.520218	0.507552	0.508178	0.511759
10% - Fail ext % for % fail force	14.0963	10.728	16.2389	11.3104	16.5972	12.9368	10.476	10.4038	10.7049	11.569
20% - Fail ext % for % fail force	20.4309	17.9952	23.7335	17.5586	25.3959	21.4426	17.6791	16.7202	17.5766	17.9866
30% - Fail ext % for % fail force	26.8631	24.0385	29.8425	23.6603	32.6477	27.7765	23.4167	22.2101	23.6358	23.9897
40% - Fail ext % for % fail force	35.2876	31.1775	36.0278	30.1283	38.6494	34.5216	29.6657	27.9462	30.9085	29.8827
50% - Fail ext % for % fail force	42.0934	39.2892	44.1857	37.8114	46.1164	41.2371	36.6496	35.4141	37.8544	36.8165
60% - Fail ext % for % fail force	49.3707	47.1422	50.0836	45.965	53.3909	48.0398	44.7725	43.5948	45.5284	45.9275
70% - Fail ext % for % fail force	57.1978	57.0167	59.6169	55.6534	60.7363	56.4265	53.7984	53.6784	54.1407	55.1055
80% - Fail ext % for % fail force	67.3736	67.8937	69.0693	66.9021	70.0011	66.6417	64.3383	64.6263	64.4782	65.2659
90% - Fail ext % for % fail force	78.163	78.5286	81.5893	80.4312	80.4792	77.9889	77.9843	78.027	76.3319	78.6622
100% - Fail ext % for % fail force	100	100	100	100	100	100	100	100	100	100
Standard deviation	SDFT IFM					CDET IFM
	foetus	0 days	0-1 month	3-6 months	1-2 years	foetus	0 days	0-1 month	3-6 months	1-2 years
Hysteresis (%)	2.01683	3.79732	2.57341	3.26666	3.74829	1.48936	3.28546	4.54392	2.04854	4.4092
Stress relaxation (%)	2.85625	2.60331	2.88083	2.03689	1.71868	1.7304	2.27511	2.25044	1.59865	3.55024
Force at failure (N)	0.182355	0.326646	0.357338	0.463356	0.21077	0.211822	0.2404	0.203363	0.0184963	0.13072
Extension at failure (mm)	0.277061	0.266158	0.733962	0.231519	0.400047	0.219483	0.21058	0.240482	0.30088	0.308298
Maximum stiffness (N/mm)	0.134646	0.216275	0.308421	0.325825	0.283202	0.100757	0.162324	0.124361	0.0945546	0.0670912
Yield force (N)	0.0263539	0.0569441	0.0711015	0.0781969	0.0296718	0.0324293	0.0394724	0.0170418	0.037202	0.0296618
Yield extension (mm)	0.0536476	0.014085	0.230718	0.0197062	0.0354748	0.0083143	0.0142106	0.00936049	0.0167334	0.00632685
10% - Fail ext % for % fail force	3.58899	0.43165	3.46952	0.811969	2.17936	1.37507	1.69809	1.1995	1.98712	0.806064
20% - Fail ext % for % fail force	4.14982	1.25617	4.70196	1.34334	2.22115	0.631233	1.44523	1.17748	2.00769	0.516646
30% - Fail ext % for % fail force	4.68967	1.99403	5.72342	2.79333	2.56675	0.466384	2.29117	1.40137	2.30134	1.05276
40% - Fail ext % for % fail force	3.36942	2.30063	5.84631	3.18598	2.45742	0.0688581	2.9693	1.88256	2.27041	1.07166
50% - Fail ext % for % fail force	3.12755	2.66151	7.92009	3.57478	3.72247	0.631482	3.33601	1.06831	2.52938	1.23391
60% - Fail ext % for % fail force	2.72377	2.33054	5.47524	3.48826	3.66672	1.11225	3.2867	1.55321	3.06911	1.85726
70% - Fail ext % for % fail force	2.88814	2.94022	5.94401	2.87312	4.09715	1.15829	3.24042	1.86928	3.18934	1.62988
80% - Fail ext % for % fail force	3.45937	3.22377	4.01579	2.8395	3.47059	0.726338	2.90397	1.23571	3.48552	2.08983
90% - Fail ext % for % fail force	2.04165	1.4749	1.75629	2.70071	3.10184	1.38735	1.87462	0.346626	3.01813	2.4356
100% - Fail ext % for % fail force	0	0	0	0	0	0	0	0	0	0
