# Supplementary material for: Postnatal mechanical loading drives adaptation of tissues primarily through modulation of the non-collagenous matrix
Source: eLife. 2020 Oct 16;9:e58075. doi: 10.7554/eLife.58075 (PMC7593091; doi:10.7554/eLife.58075)
Supplement: Table 1—source data 1. [file elife-58075-table1-data1.xlsx]

## Sheet: Sheet1
IFM matrisome proteins intensity										Fascicle matrisome proteins intensity
Protein	Division	Category	Highest mean cond	Foetus	0 days	0-1 month	3-6 months	1-2 years		Protein	Division	Category	Highest mean cond	Foetus	0 days	0-1 month	3-6 months	1-2 years
SERPINH1	Matrisome-associated	ECM Regulators	Foetus	4240000	592000	1570000	1880000	367000		COL11A1	Core matrisome	Collagens	Foetus	19600000	9010000	6090000	3830000	5850000
COL14A1	Core matrisome	Collagens	0-1 month	13200000	17600000	25700000	24600000	4560000		DCN	Core matrisome	Proteoglycans	Foetus	162000000	129000000	96900000	61900000	93200000
ASPN	Core matrisome	Proteoglycans	0-1 month	795000	4580000	7900000	5960000	2240000		FMOD	Core matrisome	Proteoglycans	Foetus	173000000	140000000	111000000	78500000	50900000
FMOD	Core matrisome	Proteoglycans	0-1 month	13600000	36300000	57800000	54000000	30900000		KERA	Core matrisome	Proteoglycans	Foetus	77900000	24000000	19100000	8010000	95000
KERA	Core matrisome	Proteoglycans	0-1 month	2750000	2670000	4830000	3840000	108000		PCOLCE	Core matrisome	ECM Glycoproteins	Foetus	6060000	2400000	1580000	1780000	223000
FBLN5	Core matrisome	ECM Glycoproteins	0-1 month	2870000	9860000	17500000	7550000	298000		SERPINF1	Matrisome-associated	ECM Regulators	Foetus	8400000	6040000	3650000	3030000	1280000
FGB	Core matrisome	ECM Glycoproteins	0-1 month	563000	417000	2450000	1380000	368000		ANXA1	Matrisome-associated	ECM-affiliated Proteins	Foetus	3070000	1100000	883000	1050000	282000
FGG	Core matrisome	ECM Glycoproteins	0-1 month	706000	127000	1860000	1150000	326000		ANXA2	Matrisome-associated	ECM-affiliated Proteins	Foetus	8860000	5770000	5240000	3770000	1670000
COL1A2	Core matrisome	Collagens	3-6 months	348000000	1110000000	1700000000	2210000000	1770000000		ANXA5	Matrisome-associated	ECM-affiliated Proteins	Foetus	11300000	4010000	2570000	2230000	1420000
COL2A1	Core matrisome	Collagens	3-6 months	141000000	360000000	592000000	850000000	641000000		LGALS1	Matrisome-associated	ECM-affiliated Proteins	Foetus	24600000	3370000	2700000	2240000	922000
COL4A1	Core matrisome	Collagens	3-6 months	2470000	4910000	9040000	14800000	11600000		COL12A1	Core matrisome	Collagens	0 days	64800000	92500000	63300000	62300000	22800000
COL4A2	Core matrisome	Collagens	3-6 months	882000	1680000	3440000	5170000	4670000		COL3A1	Core matrisome	Collagens	1-2 years	5210000	197000	384000	2000000	199000000
COL6A3	Core matrisome	Collagens	3-6 months	9800000	24300000	43300000	70900000	69500000		PRELP	Core matrisome	Proteoglycans	1-2 years	1430000	17500000	15900000	30400000	45900000
BGN	Core matrisome	Proteoglycans	3-6 months	3210000	8920000	17900000	26200000	14400000		COMP	Core matrisome	ECM Glycoproteins	1-2 years	192000	22300000	7520000	10800000	97800000
HSPG2	Core matrisome	Proteoglycans	3-6 months	1440000	3680000	5990000	12200000	8060000		FN1	Core matrisome	ECM Glycoproteins	1-2 years	213000	1320000	603000	1060000	6340000
ADIPOQ	Core matrisome	ECM Glycoproteins	3-6 months	1330000	3250000	5680000	8830000	4810000
FBN1	Core matrisome	ECM Glycoproteins	3-6 months	3120000	6400000	13300000	14100000	12700000
FN1	Core matrisome	ECM Glycoproteins	3-6 months	1620000	6690000	10300000	12000000	10200000
LAMB2	Core matrisome	ECM Glycoproteins	3-6 months	302000	1200000	2170000	3840000	2010000
LAMC1	Core matrisome	ECM Glycoproteins	3-6 months	516000	1610000	2460000	3270000	2150000
NID1	Core matrisome	ECM Glycoproteins	3-6 months	460000	872000	1710000	2260000	945000
ANXA4	Matrisome-associated	ECM-affiliated	3-6 months	479000	878000	1070000	2590000	1570000
S100A4	Matrisome-associated	Secreted Factors	3-6 months	829000	1090000	2290000	7560000	5510000
COL21A1	Core matrisome	Collagens	1-2 years	1480000	3840000	6210000	6580000	14900000
COL3A1	Core matrisome	Collagens	1-2 years	35400000	168000000	244000000	312000000	751000000
COL5A1	Core matrisome	Collagens	1-2 years	2170000	6360000	11500000	10800000	23400000
COL5A2	Core matrisome	Collagens	1-2 years	3530000	9130000	14300000	11600000	27200000
COL6A1	Core matrisome	Collagens	1-2 years	6620000	17200000	33000000	64000000	75800000
COL6A2	Core matrisome	Collagens	1-2 years	7010000	16000000	26400000	57500000	71000000
DCN	Core matrisome	Proteoglycans	1-2 years	14300000	29700000	40300000	39500000	92300000
LUM	Core matrisome	Proteoglycans	1-2 years	1640000	5150000	6820000	8180000	32500000
OGN	Core matrisome	Proteoglycans	1-2 years	4090000	13500000	16900000	22400000	33400000
PRELP	Core matrisome	Proteoglycans	1-2 years	1260000	9680000	13800000	29000000	69400000
COMP	Core matrisome	ECM Glycoproteins	1-2 years	79700	5590000	3040000	1510000	26500000
DPT	Core matrisome	ECM Glycoproteins	1-2 years	1130000	3170000	3440000	4690000	7420000
TGFBI	Core matrisome	ECM Glycoproteins	1-2 years	284000	149000	657000	1210000	2020000
